# Supplementary material for: Inactivation of Salmonella Typhimurium by Non-Thermal Plasma Bubbles: Exploring the Key Reactive Species and the Influence of Organic Matter
Source: MDPI journal article supplement (doi:10.3390/foods9111689), 2020-11-18
Supplement: s1 [file s1]

# **Supplementary material**

## **Inactivation of *Salmonella* Typhimurium by Non-Thermal Plasma Bubbles: Exploring the Key Reactive Species and the Influence of Organic Matter**

Ki Ho Baek, Ye Seul Heo, Joo Young Park, Taemin Kang, Yee Eun Lee, Junghyun  
Lim, Seong Bong Kim and Cheorun Jo

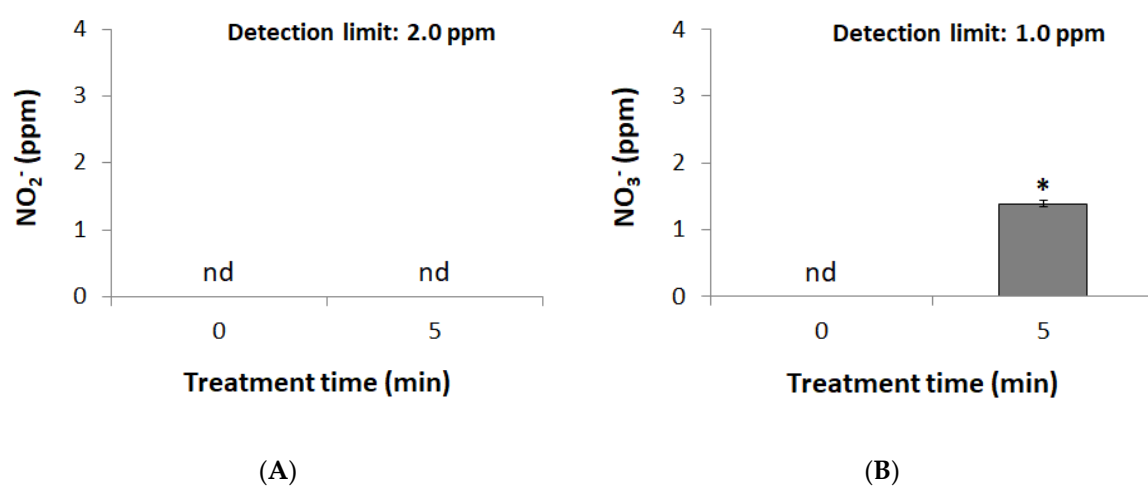

**Figure S1.** (A)  $\text{NO}_2^-$  and (B)  $\text{NO}_3^-$  concentrations in plasma activated water after 5 min of plasma bubble treatment. Error bars denote standard deviation. Student's *t*-test; \*,  $p < 0.05$  with respect to the untreated control.
